# Supplementary material
Source: publisher figshare collection journal article supplement (https://acs.figshare.com/ndownloader/files/13747055)
Supplement: Supplementary file 1 [file 13747055]

## Supporting Information (SI)

# Origin, reactivity, and bioavailability of mercury in wildfire ash

Peijia Ku <sup>†</sup>, Martin Tsz-Ki Tsui <sup>†</sup>, Xiangping Nie <sup>ζ</sup>, Huan Chen <sup>§</sup>, Tham C. Hoang <sup>¶</sup>,  
Joel D. Blum <sup>#</sup>, Randy A. Dahlgren <sup>||</sup>, Alex T. Chow <sup>§</sup>

<sup>†</sup> Department of Biology, University of North Carolina at Greensboro, Greensboro, North Carolina 27402

<sup>ζ</sup> Department of Ecology, Jinan University, Guangzhou, 510632, China

<sup>§</sup> Biogeochemistry & Environmental Quality Research Group, Clemson University, Georgetown, South Carolina 29442

<sup>¶</sup> Institute of Environmental Sustainability, Loyola University Chicago, Chicago, Illinois 60660

<sup>#</sup> Department of Earth and Environmental Sciences, University of Michigan, Ann Arbor, Michigan 48109

<sup>||</sup> Department of Land, Air and Water Resources, University of California, Davis, California 95616

### Summary of content

no. of pages: 23

no. of text: 6

no. of tables: 7

no. of figures: 7

## SI Text 1 – Physiochemical measurements and Py-GC/MS analysis

Loss-on-ignition (LOI) for all samples was measured after being held in a muffle furnace (Thermo Scientific; Thermolyne™) at 500 °C for 4 hours at the University of North Carolina at Greensboro (UNCG; Greensboro, NC). Total carbon (TC) and total nitrogen (TN) contents were analyzed on a CHN-O elemental analyzer (Thermo Scientific; FLASH 2000) at Baruch Institute of Coastal Ecology, Clemson University (Georgetown, SC). Major cations and trace elements were also analyzed for samples after acid digestion (aqua regia; following Olund et al.)<sup>1</sup> and dilution with Barnstead™ Nanopure™ water (18.2 MΩ/cm) using inductively coupled plasma–mass spectrometry (Perkin Elmer; NeXion 300S) at Institute of Environmental Sustainability, Loyola University Chicago (Chicago, IL).

The organic carbon composition in ash and unburned samples was determined by pyrolysis-gas chromatography-mass spectrometry (Py-GC-MS) at Baruch Institute of Coastal Ecology, Clemson University, following a method described by Song and Peng<sup>2</sup> and Chen et al.<sup>3</sup> In brief, individual samples (0.1–30 mg depending on organic matter content) were placed in pre-baked quartz tubes with samples held in place by glass wool. The sample-filled quartz tube was introduced into the CDS Analytical Pyroprobe 2000 “Pyrolyzer” and heated from 250 to 700 °C with a temperature ramping rate of 5 °C/millisecond and then held for 10 s on a pyrolysis injector (CDS Analytical Inc., Oxford, PA) connected to a gas chromatography-mass spectrometer (GC-MS; Agilent 7890A). Helium gas at 1 mL/min was used to flush the pyrolytic compounds into the GC column. The GC injector was operated in split-mode (10:1 to 50:1 depending on the organic matter content in sample) with an inlet temperature of 250 °C. Pyrolysis products were identified and quantified according to their GC retention time and mass spectra with reference to the Wiley/NIST library supplied with the MS workstation software 7.0.1.

The identified and quantified pyrolysis products were classified into nine groups according to their chemical similarity: (i) saturated hydrocarbon (SaH), (ii) unsaturated hydrocarbon (UnSaH), (iii) aromatic hydrocarbon (ArH), (iv) polyaromatic hydrocarbon (PAH), (v) carbohydrate (Carb), (vi) phenolic carbohydrate (PhC), (vii) lignin phenol carbohydrate (LgPhC), (viii) halogen-containing compounds (Hal), and (ix) nitrogen-containing compounds (Ntg). Relative abundance of each group was calculated as the sum of the major ion peak areas in each group divided by the sum of all major ion peak areas. An R-script (R Studio Desktop version 1.0.44; Boston, MA) was developed for automated identification and quantification.

## SI Text 2 – Sample digestion and Hg analysis

All sample processing and analysis for Hg was performed in a semi-clean analytical laboratory at UNCG. For all samples, we used two acid digestion methods to release Hg in order to assess Hg reactivity based on the differences of Hg concentrations generated by the two digestion methods. In *Method 1* (reported as  $[Hg_{\text{method-1}}]$ ),  $0.20 \pm 0.01$  g of dry samples were weighed into acid-cleaned PFA digestion vessels (Savillex, Eden Prairie, MN), and 5 mL of trace-metal grade  $HNO_3$  and  $H_2O_2$  (4:1, v:v, both from Fisher Scientific) were added and allowed to sit at room temperature overnight with the cap loosely tightened (i.e., cold digestion). On the following day, the digestion vessels were tightly closed and placed in a water bath at 80 °C overnight to complete the digestion (i.e., hot digestion). *Method 2* (reported as  $[Hg_{\text{method-2}}]$ ) followed the procedure of Olund et al.<sup>1</sup> in which samples were weighed into acid-cleaned 40 mL borosilicate glass vials with PTFE-lined septa (Thermo Scientific), and 8 mL of trace-metal grade  $HNO_3$  and HCl (i.e., aqua regia; 1:3, v:v, both from Fisher Scientific) was added and allowed to sit at room temperature for 24 h (i.e., cold digestion). Then, 22 mL of 5% BrCl was added to the acidic mixtures, and the vials containing sample mixtures were placed in a water bath at 80 °C overnight (i.e., hot digestion). To test the robustness of this approach to assess Hg reactivity in environmental samples, we also analyzed two vegetation standard reference materials (SRMs) (i.e., NIST-1515 Apple Leaves; IAEA-359 Cabbage) and litter samples from three reference forests (Angelo Coast Range Reserve in northern California, University of Michigan Biological Station in northern Michigan, and Hubbard Brook Experimental Forest in New Hampshire).

For both digestion methods, aliquots of digested samples (0.5 to 2 mL, depending on estimated Hg content) were added to 100 mL of Nanopure water (18.2 MΩ/cm) in a glass bubbler with stopper/sparger and 200-600 μL of 30% hydroxylamine (Alfa Aesar) were added to partially reduce the reagent. Gold traps were attached in connection to a soda lime trap to collect gaseous Hg(0) following complete reduction by 200 μL of 20% stannous chloride (Alfa Aesar), and the mixture was purged with Hg-free  $N_2$  gas for 15 minutes. Gold traps loaded with Hg were heat-desorbed at 400-500 °C using the double amalgamation technique, and sample Hg was quantified using a Brooks Rand Model III CVAFS detector.

Throughout sample analyses, random samples were digested in duplicate and run for Hg. A primary calibration standard solution (1 ng/mL) was prepared from SMR-NIST-3133 Hg solution and checked against an in-house secondary calibration standard (1 ng/mL) prepared from SRM-NIST-1641d Hg solution; Hg in the two standards always matched within 3%. For each batch of digestions using both methods, we included reagent blanks and standard reference materials (SRM-NIST-1515 Apple Leaves and SRM-IAEA-

359 Cabbage). Hg results were not significantly different ( $p>0.05$ ) based on the two digestion methods for SRM-NIST-1515:  $[Hg_{\text{method-1}}]$  was  $42.3 \pm 0.99$  ng/g ( $n=7$ ; mean  $\pm$  s.d.) and  $[Hg_{\text{method-2}}]$  was  $45.1 \pm 2.19$  ng/g ( $n=9$ ) (**Table S3**), while the certified value for SRM-NIST-1515 had a mean of 44.0 ng/g (range = 40.0–48.0 ng/g). Similarly, Hg results were not significantly different ( $p>0.05$ ) based on the two digestion methods for SRM-IAEA-359:  $[Hg_{\text{method-1}}]$  was  $10.2 \pm 0.88$  ng/g ( $n=3$ ) and  $[Hg_{\text{method-2}}]$  was  $10.8 \pm 1.29$  ng/g ( $n=3$ ) (**Table S3**). The certified value for SRM-IAEA-359 has a mean of 13.0 ng/g (range = 11.0–15.0 ng/g). All digested reagent blank had Hg concentrations  $<1$  ng/g (based on the same procedure as in method 2).

### SI Text 3 – Estimation of Hg volatilization in ash samples

We estimated the Hg volatilization percentage for each ash sample collected in the field. We assumed the wildfire ash was generated from the combustion of the unburned vegetation components (litter and wood) from each site. We used two mass balance methods to calculate Hg volatilization loss based on either LOI or calcium content of ash samples.

Using LOI of the ash, we assumed that the mineral components in the ash samples were completely “conserved” during combustion from the original vegetation materials. We found that the average LOI of unburned vegetation was 95.9%, which means that 4.1% of the original vegetation materials was retained in the BA and WA samples after wildfire/combustion. Therefore, we calculated the amount of biomass combusted to form the ash mineral component (total sample weight – loss on ignition) (Mineral content % =  $100\% - \text{LOI}\%$ ), using the equation  $\% \text{Hg volatilized} = 1 - \frac{Hg_{\text{ash}} / [(1 - \text{LOI}_{\text{ash}}\%) / (1 - \text{LOI}_{\text{unburned}}\%) \times Hg_{\text{unburned}}]}{Hg_{\text{unburned}}} \times 100\%$ , in which the average  $\text{LOI}_{\text{unburned}}\%$  was 95.7% for Wragg Fire, and 96.0% for Rocky Fire and the average  $Hg_{\text{unburned}}$  was 26.8 ng/g for Wragg Fire and 21.2 ng/g for Rocky Fire site (LOI and Hg data are shown in **SI Table S2**)

Using Ca content of the ash, we assumed no change in Ca content in the original vegetation of the wildfire conditions (i.e., no loss of Ca). We used this equation:  $\% \text{Hg volatilized} = 1 - \frac{Hg_{\text{ash}} / [(1 - \text{Ca}_{\text{ash}}\%) / (1 - \text{Ca}_{\text{unburned}}\%) \times Hg_{\text{unburned}}]}{Hg_{\text{unburned}}} \times 100\%$ , in which the average Ca content of unburned vegetation was 14.7 mg/g for Wragg Fire site and 10.5 mg/g for Rocky Fire site, and the average  $Hg_{\text{unburned}}$  concentration was 26.8 ng/g for Wragg Fire site and 21.2 ng/g for Rocky Fire site (Ca and Hg data are shown in **SI Table S2**).

### SI Text 4 – Sample processing and stable Hg isotope analysis

We performed thermal combustion for stable Hg isotope analysis on unburned litter from three natural,

unburned forests in the U.S. (Angelo Coast Range Reserve in northern California, University of Michigan Biological Station in northern Michigan, and Hubbard Brook Experimental Forest in central New Hampshire) and the Wragg Fire ash samples ( $n=10$ ; 5 black ash [BA] and 5 white ash [WA]). Prior to thermal combustion, each dry sample was weighed into two clean ceramic sample boats (~0.5-1.0 g per boat), and packed with layers of pre-baked combustion powders (Nippon Instruments Corporation). Samples with low Hg content required multiple rounds of combustion and sample Hg was later combined during the purge-and-trap sample purification step in order to have sufficient Hg ( $> 10$  ng) for high-precision isotopic analysis (*see below*).

In brief, samples were thermally combusted in a two-stage furnace (the first furnace ramped from room temperature to 750 °C over 6 hours and the second furnace was held at 1,000 °C for the entire period). The released gaseous Hg(0) was collected into a 24 g trap solution containing 1% KMnO<sub>4</sub> (w/w) in 10% trace-metal grade H<sub>2</sub>SO<sub>4</sub> (v/v). Following combustion, the trap solution was transferred into an acid-cleaned 40 mL borosilicate glass vial with PTFE-lined septum. To analyze Hg content, the trap solution was completely neutralized with 30% hydroxylamine, and an aliquot of solution was taken for quantification of Hg using the CVAFS system (Brooks Rand Model III CVAFS; described in **SI Text 2**).

Mercury in the initial trap solution (from combustion) was purged (upon complete reduction by 20% SnCl<sub>2</sub>) and trapped into a smaller trap solution (6 to 15 g of 1% KMnO<sub>4</sub> in 10% H<sub>2</sub>SO<sub>4</sub>, depending on the total amount of sample Hg) in order to (i) separate sample Hg from other combustion products in the initial trap solution, and (ii) concentrate Hg in this final solution for Hg isotope analysis. The final trap solution was neutralized and an aliquot of solution was taken for analyzing Hg to determine the recovery of Hg during the purge-and-trap (typically  $> 95\%$ ). Hg levels in the final trap solution were precisely adjusted to a uniform Hg concentration ( $\pm 5\%$ ) along with a bracketing Hg isotope standard (SRM-NIST-3133) ranging from 2-5 ng/g (Blum and Bergquist, 2007).

Stable Hg isotope ratios were measured using a Nu Instruments multicollector-inductively coupled plasma-mass spectrometer (MC-ICP-MS) following the methods of Blum and Bergquist<sup>4</sup> in the Biogeochemistry and Environmental Isotope Geochemistry Laboratory at the University of Michigan (Ann Arbor, MI). Mass-dependent fractionation (MDF) of Hg isotopes was reported as  $\delta^{202}\text{Hg}$  in permil (‰) referenced to SRM-NIST-3133, while mass-independent fractionation (MIF) of Hg isotopes is the difference between the measured  $\delta^{202}\text{Hg}$  value and the value that would be predicted based on mass dependence. The mass-independent Hg isotope composition is reported in ‰ for both odd-mass isotopes  $\Delta^{199}\text{Hg}$  and  $\Delta^{201}\text{Hg}$  and even-mass isotopes  $\Delta^{200}\text{Hg}$  and  $\Delta^{204}\text{Hg}$ . Isotopic compositions were calculated

according to Blum and Bergquist<sup>4</sup> as:

$$\delta^{202}\text{Hg} = \left\{ \left[ \left( \frac{{}^{202}\text{Hg}}{{}^{198}\text{Hg}} \right)_{\text{sample}} \div \left( \frac{{}^{202}\text{Hg}}{{}^{198}\text{Hg}} \right)_{\text{NIST 3133}} \right] - 1 \right\} \times 1000 \quad (1)$$

$$\Delta^{201}\text{Hg} \approx \delta^{201}\text{Hg}_{\text{measured}} - (\delta^{202}\text{Hg}_{\text{measured}} \times 0.752) \quad (2)$$

$$\Delta^{199}\text{Hg} \approx \delta^{199}\text{Hg}_{\text{measured}} - (\delta^{202}\text{Hg}_{\text{measured}} \times 0.2520) \quad (3)$$

$$\Delta^{200}\text{Hg} \approx \delta^{200}\text{Hg}_{\text{measured}} - (\delta^{202}\text{Hg}_{\text{measured}} \times 0.5024) \quad (4)$$

$$\Delta^{204}\text{Hg} \approx \delta^{204}\text{Hg}_{\text{measured}} - (\delta^{202}\text{Hg}_{\text{measured}} \times 1.4930) \quad (5)$$

Analytical uncertainty was determined from replicated analyses of a secondary standard solution (UM-Almadén, mean values:  $\delta^{202}\text{Hg} = -0.56 \text{ ‰}$ ;  $\Delta^{199}\text{Hg} = -0.02 \text{ ‰}$ ;  $n=11$ ), and replicate combustions and analyses of SRM-NIST-1515 (Apple Leaves [UNCG lot], mean values:  $\delta^{202}\text{Hg} = -2.64 \text{ ‰}$ ;  $\Delta^{199}\text{Hg} = 0.05 \text{ ‰}$ ;  $n=6$ ) along with the field samples. These isotopic compositions are similar to previous studies (e.g., Demers et al.)<sup>5</sup>. External analytical reproducibility of  $\delta^{202}\text{Hg}$  measurements was estimated to be  $\pm 0.08 \text{ ‰}$  for solutions with 5.0 ng/g and  $\pm 0.14 \text{ ‰}$  for 1.9 ng/g (2 SD) and for  $\Delta^{199}\text{Hg}$  it was estimated to be  $\pm 0.07 \text{ ‰}$  (2 SD), based on the repeated analyses of SRM-NRCC-TORT-2 analyzed at different final Hg concentrations on MC-ICP-MS (1.9-5.0 ng/g).<sup>6,7</sup>

## SI Text 5 – Testing sorption capability of Hg by wildfire ash

The ability of wildfire ash to adsorb aqueous Hg(II) was assessed in two sorption experiments that involved adding 1.0 g of ash (4 black ash and 4 white ash from the Wragg Fire, and activated carbon [CAS 7440-44-0; Alfa Aesar] as a positive control) into 100 mL of 18.2 MΩ/cm water spiked with HgCl<sub>2</sub> (Sigma-Aldrich) in 500 mL acid-cleaned borosilicate glass Erlenmeyer flasks. The mean actual Hg concentration in filtered, spiked solution before sorption was 70.3 pg/mL in the first experiment and 74.8 pg/mL in the second experiment. The ash as a solid slurry was shaken for 24 h on a shaker table at room temperature. The slurry was filtered through a pre-baked glass fiber filter (Whatman GF/B, 1.0-μm pore size). Filtered aqueous samples were treated with an acidic mixture of permanganate/persulfate and heated at 80 °C overnight to complete sample digestion.<sup>8</sup> Digested samples were neutralized, and weighed aliquots were analyzed for Hg as previously described.

To test the capability of ash at adsorbing gaseous elemental Hg(0), we set up a sorption experiment using the purge-and-trap setup we routinely used for purging large volumes of stream water for Hg isotopic analysis (see *setup and detailed procedures in Woerndle et al.*)<sup>8</sup>. The Hg(0) gas is slowly released by this method as SnCl<sub>2</sub> is slowly added to the reservoir of aqueous sample with Hg, as opposed to the situation

for Hg analysis described above. In brief, we prepared 500 mL of acidic solution spiked with 15.0 ng of Hg from our SRM-NIST-3133 standard solution. We purged this solution by adding 10% SnCl<sub>2</sub> at a rate of ~1 mL/min. Reduced Hg(0) was sparged with 0.45-µm filtered Hg-free ambient air (produced by a vacuum pump and passed through a Teflon filter and a gold-coated glass trap), and transferred through a soda lime trap (to remove moisture and neutralize acidic fumes) and a Teflon trap with only glass wool (as a negative control) or filled with an ash sample (Wragg Fire BA and WA) or activated carbon (CAS 7440-44-0; Alfa Aesar) as a positive control. The length of packed material inside the Teflon trap was 4.2 cm with an average mass of materials of 1.22±0.14 g (mean±s.d.). Any Hg(0) not removed by the ash or activated carbon trap was collected by the final, downstream gold trap. The gold trap was dried with Hg-free N<sub>2</sub> gas for 20 minutes, and analyzed for Hg as described above.

#### **SI Text 6 – Examining bioavailability of Hg in ash during incubation**

We conducted 4- and 12-week incubation experiments of ash and an unburned litter sample from a northern California forest (Angelo Coast Range Reserve, Branscomb, CA) using sealed bottles. Previous studies have demonstrated that sealed bottle incubation with fresh litter and freshly collected stream water quickly turned anoxic (<1 week) and active microbial Hg methylation quickly proceeded with inorganic Hg(II) released from the decomposing litter.<sup>9,10</sup> This study inoculated samples with the microbial community in freshly collected surface water from an urban stream near UNCG (South Buffalo Creek at Greensboro, NC; GPS location: 36.050563, -79.748731). A preliminary experiment using “aged” stream water (>3 months stored at 4 °C) from the catchment burned by the Wragg Fire in California did not result in detectable levels of MeHg even in the litter-incubated treatment (*data not shown*). This suggests that the anaerobic, methylating microbes needed to be derived from water freshly collected from the ambient environment.

In brief, the incubation experiments used 250 mL air-tight, sterile PETG bottles (Nalgene), and each bottle received 2.80±0.01 g of 2-mm sieved ash or homogenized litter sample. A 280±1.21 mL of unfiltered stream water (with resultant minimal head space in the container) was added to achieve a solid-to-water ratio of 10 g/L, which was 5 times higher than our previous incubation experiments using similar methods.<sup>10</sup> The bottle was tightly capped and further wrapped with layers of Parafilm to secure the closing. We did not flush the ash slurry with N<sub>2</sub> gas as anoxia was expected to develop quickly over the course of incubation. Each treatment was performed in triplicate. Sealed bottles were placed in the dark at room temperature (20-22 °C) for 4 weeks or 12 weeks. Each bottle was shaken daily to mix the contents.<sup>10,11</sup>

At the end of the incubation, bottles were opened and the "rotten egg" odor (i.e., hydrogen sulfide) was noted if it was present or absent to indicate the existence of sulfate-reduction during incubation.<sup>9,10</sup> The aqueous solution was immediately filtered through a pre-baked Whatman GF/B filter (1.0- $\mu$ m pore size) in an acid- and BrCl-cleaned glass filtration apparatus (Kimble™ Kontes™). Filtered samples were analyzed separately for pH, specific conductivity (12-week samples only), total-dissolved nitrogen (TDN), dissolved organic carbon (DOC), SUVA<sub>254</sub> (proxy for aromaticity of DOC), Hg and methylmercury (MeHg).

Hg in filtered water samples was analyzed after digestion using an acidic mixture of KMnO<sub>4</sub> and K<sub>2</sub>S<sub>2</sub>O<sub>8</sub>, and heated at 80 °C overnight.<sup>8</sup> Filtered water samples were preserved with 0.4 % HCl<sup>12</sup> and kept in the dark at 4 °C prior to distillation for matrix removal and MeHg analysis (Brooks Rand Model III CVAFS with GC/pyrolysis module). Procedures for MeHg analysis in aqueous samples at the UNCG laboratory are fully described in Woerndle et al.<sup>8</sup> Percent of Hg as MeHg (i.e., %MeHg) in the filtered solution was used to evaluate Hg methylation potential, or conversely, the bioavailability of Hg for microbial methylation.<sup>10,13</sup>

Measured physiochemical properties of the filtered solution included pH (Mettler Toledo pH meter), specific conductivity (Fisher Scientific conductivity meter), dissolved organic carbon (DOC) and total-dissolved nitrogen (TDN) (Shimadzu TOC analyzer). The UV-absorbance at 254 nm (UV<sub>254</sub>) was measured using a diode array spectrophotometer (Hewlett Packard P8452A) and then used to calculate specific UV absorbance at 254 nm (SUVA<sub>254</sub>; in L/mg-C/m) as a proxy for DOC aromaticity.<sup>14</sup>



223 **Table S1** Summary of wildfire site characteristics and sampling information.

|                            | Wragg Fire                                                   | Rocky Fire                                                   |
|----------------------------|--------------------------------------------------------------|--------------------------------------------------------------|
| Dates                      | July 22 to August 5, 2015                                    | July 29 to August 14, 2015                                   |
| Locations                  | Lake Berryessa, CA                                           | Clearlake, CA                                                |
| Coordinates                | 38°29'12.98"N, 122° 4'30.29"W                                | 38°57'48.29"N, 122°29'10.91"W                                |
| Burned area                | 33 km <sup>2</sup>                                           | 281 km <sup>2</sup>                                          |
| Soil parent material       | Mixed sedimentary: shale, mudstone & sandstone               | Mixed sedimentary: shale, mudstone & sandstone               |
| Dominant soils             | Lithic Haploxerepts & Typic Dystroxerepts                    | Typic Dystroxerepts & <i>Mollic Haploxeralfs</i>             |
| Dominant vegetation        | Blue oak, live oak, scrub oak, chamise, manzanita, ceonothus | Blue oak, live oak, scrub oak, chamise, manzanita, ceonothus |
| Date of sampling           | August 25, 2015                                              | September 19, 2015                                           |
| Rainfall prior to sampling | No                                                           | No                                                           |
| Sampling points            | ~ 0.5 km transect / trail                                    | ~ 10-11 km between sites, along fire perimeter               |

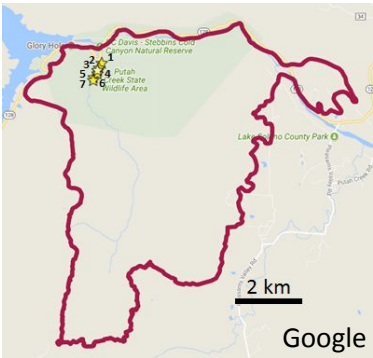

WR1: 1xWA, 1xBA  
WR2: 1xWA  
WR3: 1xWA, 1xBA  
WR4: 1xBA  
WR5: 1xBA  
WR6: 1xWA  
WR7: 1XWA, 1xBA

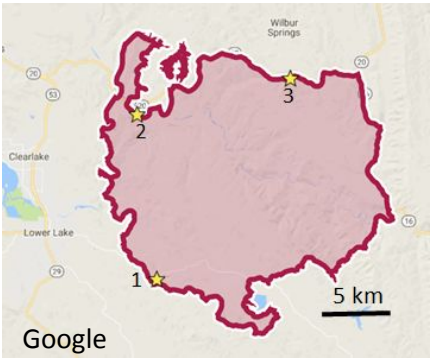

RO1: 3xWA, 3xBA  
RO2: 3xWA, 3xBA  
RO3: 3xWA, 3xBA

225 **Table S2** Different physicochemical properties of standard reference materials (SRMs), litter samples from reference forests, ash and unburned samples from the Wragg  
226 Fire (2015), and ash and unburned samples from the Rocky Fire (2015). *Note:* SRM-NIST-1515: apple leaves ( $n=9$ ); SRM-IAEA-359: cabbage ( $n=3$ ); CA-Litter: Angelo  
227 Coast Range Reserve ( $n=1$ ); NH-Litter: Hubbard Brook Experimental Forest ( $n=3$ ); MI-Litter: University of Michigan Biological Station ( $n=3$ ). Individual sample data are  
228 shown for all ash and unburned samples. ND = not determined.

| Category              | Sample ID   | Munsell color<br>(Hue Value/Chroma) | LOI<br>(%) | TN (%) | Ca (%) | Fe (%) | Hg <sub>method-1</sub><br>(ng/g) | Hg <sub>method-2</sub><br>(ng/g) | Recalcitrant<br>Hg (%) | Relative abundance of pyrolysis products (%) |       |     |     |      |     |       |     |     |
|-----------------------|-------------|-------------------------------------|------------|--------|--------|--------|----------------------------------|----------------------------------|------------------------|----------------------------------------------|-------|-----|-----|------|-----|-------|-----|-----|
|                       |             |                                     |            |        |        |        |                                  |                                  |                        | SaH                                          | UnSaH | ArH | PAH | Carb | PhC | LgPhC | Hal | Ntg |
| SRMs                  | NIST-1515   | ND                                  | ND         | ND     | 1.7    | 0.012  | 42.3                             | 45.1                             | 8.7                    | ND                                           | ND    | ND  | ND  | ND   | ND  | ND    | ND  | ND  |
|                       | IAEA-359    | ND                                  | ND         | ND     | 1.7    | 0.020  | 10.2                             | 10.8                             | 6.1                    | ND                                           | ND    | ND  | ND  | ND   | ND  | ND    | ND  | ND  |
| Litter (ref. forests) | CA-Litter   | ND                                  | 93.7       | 0.69   | 2.0    | 0.048  | 32.2                             | 35.0                             | 8.2                    | 0                                            | 2     | 13  | 0   | 20   | 50  | 16    | 0   | 0   |
|                       | NH-Litter   | ND                                  | 96.3       | 1.73   | ND     | ND     | 53.2                             | 57.8                             | 8.2                    | 4                                            | 19    | 8   | 4   | 21   | 23  | 17    | 1   | 6   |
|                       | MI-Litter   | ND                                  | 97.1       | 0.90   | ND     | ND     | 41.7                             | 45.0                             | 7.3                    | 4                                            | 19    | 9   | 4   | 21   | 24  | 16    | 0   | 5   |
| Wragg-unburned        | Oak Litter  | ND                                  | 94.8       | 1.97   | 1.4    | 0.80   | 27.2                             | 28.1                             | 3.1                    | 1                                            | 0     | 11  | 0   | 36   | 13  | 8     | 0   | 30  |
|                       | Pine Litter | ND                                  | 96.3       | 1.39   | 1.0    | 0.14   | 42.6                             | 40.1                             | 0                      | 1                                            | 0     | 12  | 1   | 33   | 22  | 10    | 1   | 19  |
|                       | Oak Wood    | ND                                  | 92.7       | 0.69   | 3.1    | 0.04   | 25.4                             | 24.3                             | 4.6                    | 1                                            | 1     | 6   | 0   | 25   | 11  | 15    | 0   | 41  |
|                       | Pine Wood   | ND                                  | 98.6       | 0.44   | 0.4    | 0.02   | 14.1                             | 14.6                             | 3.5                    | 0                                            | 0     | 5   | 0   | 21   | 26  | 16    | 5   | 31  |
| Wragg-black ash       | WR1-BA      | Gley1 3.5/N                         | 31.0       | 0.64   | 9.7    | 2.3    | 2.8                              | 7.9                              | 64.7                   | 3                                            | 4     | 61  | 2   | 7    | 5   | 0     | 2   | 15  |
|                       | WR3-BA      | Gley1 3/N                           | 35.8       | 1.39   | 6.4    | 2.7    | 9.8                              | 18.1                             | 46.1                   | 5                                            | 5     | 31  | 1   | 16   | 20  | 6     | 3   | 12  |
|                       | WR4-BA      | Gley 1 3.5/N                        | 23.2       | 1.08   | 6.1    | 2.8    | 7.8                              | 12.2                             | 35.7                   | 7                                            | 7     | 36  | 1   | 16   | 13  | 1     | 4   | 15  |
|                       | WR5-BA      | ND                                  | 49.3       | 1.54   | 9.3    | 1.4    | 9.7                              | 10.6                             | 7.9                    | 9                                            | 33    | 17  | 2   | 6    | 26  | 2     | 0   | 6   |
|                       | WR7-BA      | Gley 1 2.75/N                       | 36.9       | 1.17   | 6.0    | 2.9    | 8.1                              | 10.7                             | 24.5                   | 7                                            | 38    | 15  | 3   | 4    | 14  | 0     | 0   | 20  |
| Wragg-white ash       | WR1-WA      | Gley1 5.5/N                         | 6.6        | 0.23   | 24.9   | 1.7    | 8.6                              | 9.2                              | 6.2                    | 7                                            | 30    | 33  | 3   | 6    | 2   | 0     | 3   | 15  |
|                       | WR2-WA      | Gley1 7/N                           | 2.9        | 0.11   | 29.0   | 1.4    | 15.6                             | 16.4                             | 4.9                    | 0                                            | 0     | 80  | 5   | 1    | 0   | 0     | 0   | 14  |
|                       | WR3-WA      | Gley1 5.5/N                         | 4.0        | 0.14   | 26.2   | 2.1    | 15.0                             | 14.8                             | 0                      | 0                                            | 1     | 77  | 5   | 3    | 0   | 0     | 0   | 13  |
|                       | WR6-WA      | Gley1 5.5/N                         | 4.0        | 0.15   | 30.1   | 1.6    | 119.8                            | 124.6                            | 3.9                    | 0                                            | 3     | 74  | 6   | 4    | 0   | 0     | 0   | 14  |
|                       | WR7-WA      | Gley1 5.5/N                         | 5.9        | 0.17   | 28.0   | 1.3    | 7.5                              | 8.8                              | 14.3                   | 2                                            | 12    | 62  | 6   | 1    | 0   | 0     | 0   | 17  |
| Rocky-unburned        | Oak Litter  | ND                                  | 94.0       | 1.87   | 1.3    | 0.02   | 18.3                             | 20.3                             | 9.5                    | 1                                            | 0     | 16  | 0   | 34   | 24  | 6     | 0   | 20  |
|                       | Pine Litter | ND                                  | 97.4       | 0.62   | 0.7    | 0.01   | 28.4                             | 30.1                             | 5.8                    | 0                                            | 0     | 12  | 2   | 33   | 26  | 8     | 1   | 19  |
|                       | Oak Wood    | ND                                  | 95.9       | 0.67   | 1.8    | 0.02   | 16.0                             | 16.2                             | 1.1                    | 1                                            | 0     | 4   | 0   | 15   | 8   | 24    | 0   | 49  |
|                       | Pine Wood   | ND                                  | 98.6       | 0.55   | 0.6    | 0.01   | 73.3                             | 57.0                             | 0.0                    | 0                                            | 0     | 5   | 0   | 17   | 39  | 15    | 0   | 24  |
| Rocky-black ash       | RO1-BA1     | Gley1 2.5/N                         | 26.9       | 0.60   | 5.1    | 4.8    | 7.2                              | 26.5                             | 72.7                   | 2                                            | 5     | 52  | 3   | 8    | 18  | 1     | 1   | 9   |
|                       | RO1-BA2     | Gley1 2.5/N                         | 31.2       | 0.40   | 2.9    | 5.2    | 12.8                             | 31.8                             | 59.8                   | 5                                            | 11    | 47  | 2   | 14   | 13  | 3     | 1   | 4   |
|                       | RO1-BA3     | Gley1 2.75/N                        | 33.6       | 0.45   | 4.4    | 5.2    | 14.1                             | 56.5                             | 75.1                   | 4                                            | 10    | 47  | 3   | 10   | 12  | 3     | 2   | 9   |
|                       | RO2-BA1     | Gley1 2.5/N                         | 58.3       | 2.06   | 4.2    | 1.8    | 28.3                             | 42.6                             | 33.6                   | 4                                            | 7     | 35  | 2   | 15   | 19  | 2     | 2   | 13  |
|                       | RO2-BA2     | 10YR 2/1                            | 62.1       | 2.11   | 3.1    | 1.2    | 8.9                              | 15.8                             | 43.4                   | 4                                            | 6     | 39  | 3   | 12   | 16  | 5     | 2   | 14  |
|                       | RO2-BA3     | Gley1 2.5/N                         | 44.0       | 1.54   | 3.1    | 2.6    | 27.4                             | 48.2                             | 43.2                   | 4                                            | 7     | 29  | 1   | 14   | 21  | 9     | 2   | 12  |
|                       | RO3-BA1     | 10YR 2/1                            | 38.0       | 1.00   | 4.8    | 3.4    | 47.8                             | 94.0                             | 49.2                   | 3                                            | 6     | 45  | 4   | 12   | 18  | 1     | 2   | 11  |
|                       | RO3-BA2     | 2.5Y 2.5/1                          | 60.9       | 1.85   | 4.2    | 1.8    | 29.0                             | 42.9                             | 32.3                   | 4                                            | 5     | 29  | 1   | 16   | 21  | 11    | 1   | 11  |
|                       | RO3-BA3     | 5Y 2.5/1                            | 52.3       | 1.40   | 3.4    | 2.3    | 27.1                             | 39.9                             | 32.0                   | 4                                            | 5     | 29  | 1   | 18   | 21  | 8     | 3   | 12  |
| Rocky-white ash       | RO1-WA1     | 10YR 7.5/1                          | 2.4        | 0.08   | 26.5   | 2.3    | 40.4                             | 78.0                             | 48.2                   | 0                                            | 1     | 86  | 4   | 3    | 0   | 0     | 0   | 7   |
|                       | RO1-WA2     | 10YR 7/1                            | 2.6        | 0.09   | 26.8   | 2.3    | 11.6                             | 13.9                             | 16.6                   | 0                                            | 0     | 83  | 5   | 3    | 0   | 0     | 0   | 10  |
|                       | RO1-WA3     | 2.5Y 7/1                            | 5.5        | 0.16   | 27.5   | 2.1    | 42.0                             | 61.8                             | 32.1                   | 3                                            | 5     | 58  | 5   | 13   | 1   | 0     | 0   | 16  |
|                       | RO2-WA1     | 2.5Y 6.5/1                          | 15.2       | 0.06   | 15.9   | 1.4    | 4.0                              | 5.9                              | 31.7                   | 6                                            | 7     | 69  | 4   | 9    | 1   | 0     | 0   | 5   |
|                       | RO2-WA2     | Gley1 7.5/N                         | 3.0        | 0.07   | 34.0   | 1.5    | 30.8                             | 32.4                             | 5.1                    | 2                                            | 4     | 72  | 7   | 7    | 1   | 0     | 0   | 7   |
|                       | RO2-WA3     | WP 8.75/N                           | 2.9        | 0.00   | 36.5   | 1.1    | 1.7                              | 3.9                              | 56.1                   | 6                                            | 16    | 51  | 3   | 22   | 0   | 0     | 0   | 2   |
|                       | RO3-WA1     | 2.5Y 7.5/1                          | 7.8        | 0.00   | 33.9   | 1.0    | 2.9                              | 5.0                              | 41.8                   | 2                                            | 5     | 68  | 7   | 5    | 0   | 0     | 0   | 14  |
|                       | RO3-WA2     | 2.5Y 6/1                            | 3.7        | 0.07   | 43.2   | 0.6    | 12.4                             | 14.0                             | 11.3                   | 7                                            | 10    | 58  | 4   | 12   | 3   | 0     | 2   | 3   |
|                       | RO3-WA3     | Gley1 7.5/N                         | 3.4        | 0.05   | 30.2   | 1.4    | 5.8                              | 8.4                              | 30.7                   | 3                                            | 5     | 69  | 6   | 7    | 0   | 0     | 0   | 10  |

**Table S3** Estimated mercury (Hg) volatilization from original fuel loads (assumed to be a mixture of litter and dead woody materials) in the Wragg Fire (2015; WR) and the Rocky Fire (2015; RO). Our estimations are based on two approaches: loss-on-ignition (LOI) and calcium (Ca) content of ash samples.

| Sample ID | Hg volatilization (%)<br><i>based on LOI</i> | Hg volatilization (%)<br><i>based on Ca content</i> |
|-----------|----------------------------------------------|-----------------------------------------------------|
| WR1-BA    | 98.6                                         | 96.3                                                |
| WR3-BA    | 96.6                                         | 87.1                                                |
| WR4-BA    | 98.1                                         | 90.9                                                |
| WR5-BA    | 97.5                                         | 94.8                                                |
| WR7-BA    | 98.0                                         | 91.9                                                |
| WR1-WA    | 99.2                                         | 98.2                                                |
| WR2-WA    | 98.6                                         | 97.3                                                |
| WR3-WA    | 98.7                                         | 97.3                                                |
| WR6-WA    | 89.3                                         | 80.1                                                |
| WR7-WA    | 99.2                                         | 98.5                                                |
| RO1-BA1   | 91.7                                         | 82.6                                                |
| RO1-BA2   | 89.4                                         | 62.8                                                |
| RO1-BA3   | 80.4                                         | 56.6                                                |
| RO2-BA1   | 76.5                                         | 66.2                                                |
| RO2-BA2   | 90.4                                         | 82.8                                                |
| RO2-BA3   | 80.2                                         | 47.2                                                |
| RO3-BA1   | 65.1                                         | 34.0                                                |
| RO3-BA2   | 74.7                                         | 65.4                                                |
| RO3-BA3   | 80.7                                         | 60.5                                                |
| RO1-WA1   | 81.6                                         | 90.1                                                |
| RO1-WA2   | 96.7                                         | 98.3                                                |
| RO1-WA3   | 84.9                                         | 92.4                                                |
| RO2-WA1   | 98.4                                         | 98.8                                                |
| RO2-WA2   | 92.3                                         | 96.8                                                |
| RO2-WA3   | 99.1                                         | 99.6                                                |
| RO3-WA1   | 98.7                                         | 99.5                                                |
| RO3-WA2   | 96.6                                         | 98.9                                                |
| RO3-WA3   | 98.0                                         | 99.1                                                |

234 **Table S4** Stable mercury (Hg) isotope compositions of undecomposed litter from reference forests, published data on foliage in other North  
235 American forests<sup>15</sup>, and black ash (BA) and white ash (WA) samples from Wragg Fire (2015). *Note:* MDF=mass dependent fractionation; MIF=mass  
236 independent fractionation.

| Sample type and/or sources                                                             | Location / Sample ID         | $\delta^{202}\text{Hg}$ (‰)<br>[MDF] | $\Delta^{204}\text{Hg}$<br>(‰)<br>[MIF] | $\Delta^{201}\text{Hg}$<br>(‰)<br>[MIF] | $\Delta^{200}\text{Hg}$<br>(‰)<br>[MIF] | $\Delta^{199}\text{Hg}$ (‰)<br>[MIF] |
|----------------------------------------------------------------------------------------|------------------------------|--------------------------------------|-----------------------------------------|-----------------------------------------|-----------------------------------------|--------------------------------------|
| Reference forests                                                                      | Angelo Forest / CA-Litter    | -2.07                                | 0.12                                    | -0.37                                   | -0.04                                   | -0.43                                |
|                                                                                        | Hubbard Forest / HB-Litter 1 | -1.98                                | 0.01                                    | -0.38                                   | 0.03                                    | -0.39                                |
|                                                                                        | Hubbard Forest / HB-Litter 2 | -2.16                                | 0.00                                    | -0.34                                   | -0.01                                   | -0.38                                |
|                                                                                        | Hubbard Forest / HB-Litter 3 | -2.10                                | 0.02                                    | -0.28                                   | 0.01                                    | -0.32                                |
|                                                                                        | U-M Biostation / MI-Litter 1 | -2.03                                | -0.01                                   | -0.30                                   | 0.00                                    | -0.32                                |
|                                                                                        | U-M Biostation / MI-Litter 2 | -2.11                                | 0.05                                    | -0.21                                   | -0.04                                   | -0.22                                |
|                                                                                        | U-M Biostation / MI-Litter 3 | -2.05                                | 0.03                                    | -0.22                                   | 0.00                                    | -0.24                                |
| Published data in foliage in other North American forests (Zheng et al.) <sup>15</sup> | Truckee, CA                  | -2.67                                | -0.01                                   | -0.04                                   | 0.01                                    | -0.10                                |
|                                                                                        |                              | -2.27                                | 0.01                                    | -0.04                                   | 0.04                                    | -0.06                                |
|                                                                                        |                              | -2.08                                | -0.01                                   | 0.00                                    | 0.02                                    | -0.06                                |
|                                                                                        | Niwot Ridge, CO              | -2.31                                | -0.01                                   | -0.31                                   | -0.04                                   | -0.35                                |
|                                                                                        |                              | -2.32                                | 0.01                                    | -0.18                                   | 0.00                                    | -0.20                                |
|                                                                                        | Howland, ME                  | -2.35                                | 0.08                                    | -0.24                                   | -0.05                                   | -0.30                                |
|                                                                                        |                              | -2.38                                | 0.06                                    | -0.27                                   | -0.02                                   | -0.30                                |
|                                                                                        | Thompson Forest, WA          | -2.66                                | 0.00                                    | -0.47                                   | 0.01                                    | -0.47                                |
|                                                                                        |                              | -2.45                                | 0.02                                    | -0.35                                   | -0.01                                   | -0.36                                |
| Black ash (BA)                                                                         | WR1-BA                       | -1.87                                | -0.01                                   | -0.20                                   | 0.08                                    | -0.17                                |
|                                                                                        | WR3-BA                       | -1.65                                | -0.03                                   | -0.20                                   | 0.03                                    | -0.14                                |
|                                                                                        | WR4-BA                       | -1.60                                | -0.05                                   | -0.13                                   | 0.03                                    | -0.04                                |
|                                                                                        | WR5-BA                       | -1.46                                | 0.09                                    | -0.19                                   | 0.01                                    | -0.21                                |
|                                                                                        | WR7-BA                       | -2.14                                | 0.00                                    | -0.03                                   | 0.01                                    | 0.10                                 |
| White ash (WA)                                                                         | WR1-WA                       | -1.93                                | -0.04                                   | -0.05                                   | 0.04                                    | -0.04                                |
|                                                                                        | WR2-WA                       | -1.05                                | -0.12                                   | -0.24                                   | -0.03                                   | -0.16                                |
|                                                                                        | WR3-WA                       | -1.11                                | -0.14                                   | 0.00                                    | -0.02                                   | -0.02                                |
|                                                                                        | WR6-WA                       | -0.77                                | 0.00                                    | -0.23                                   | 0.04                                    | -0.19                                |
|                                                                                        | WR7-WA                       | -1.62                                | -0.07                                   | 0.01                                    | 0.00                                    | 0.02                                 |

238 **Table S5** Summary of results from Hg in sorption experiments examining sorption of ash (from the Wragg  
 239 Fire only) and activated carbon on aqueous Hg(II) and gaseous Hg(0). ND = not determined.

|                  | <b>Removal of aqueous Hg(II)</b><br>(~7.0-7.5 ng per test) | <b>Removal of gaseous Hg(0)</b><br>(15 ng per test) |
|------------------|------------------------------------------------------------|-----------------------------------------------------|
| Activated carbon | 99.9%                                                      | 99.9%                                               |
| WR1-BA           | 97.2%                                                      | 2.9%                                                |
| WR3-BA           | 89.2%                                                      | 1.6%                                                |
| WR4-BA           | 95.3%                                                      | ND                                                  |
| WR5-BA           | ND                                                         | 1.4%                                                |
| WR7-BA           | 88.3%                                                      | 2.1%                                                |
| WR1-WA           | 95.6%                                                      | ND                                                  |
| WR2-WA           | 98.3%                                                      | 5.4%                                                |
| WR3-WA           | 94.4%                                                      | 0.4%                                                |
| WR6-WA           | ND                                                         | ND                                                  |
| WR7-WA           | 82.4%                                                      | ND                                                  |

240

**Table S6** Summary of results of sealed incubation experiments after 4-weeks. Results are means  $\pm$  S.D., except for MeHg in which we pooled the majority of samples from replicates for analysis. All dissolved constituents represent  $<1.0\text{-}\mu\text{m}$  fraction. Note: smell is sulfide, “rotten” egg smell present (+) or absent (-); DOC=dissolved organic carbon; SUVA<sub>254</sub>=specific ultraviolet absorbance at 254 nm (proxy of DOC aromaticity); TDN=total dissolved nitrogen; Hg=mercury; MeHg=methylmercury; %MeHg=percent of Hg as MeHg.

|            | Sulfidic<br>smell | pH             | DOC (mg/L)      | SUVA <sub>254</sub><br>(L/mg/m) | TDN<br>(mg/L)  | Filtered<br>Hg (ng/L) | Filtered<br>MeHg (ng/L) | %MeHg |
|------------|-------------------|----------------|-----------------|---------------------------------|----------------|-----------------------|-------------------------|-------|
| Water-only | -                 | 8.0 $\pm$ 0.0  | 7.6 $\pm$ 0.2   | 2.0 $\pm$ 0.1                   | 0.9 $\pm$ 0.0  | 0.7 $\pm$ 0.1         | <0.02 $\pm$ 0.0         | 2.9   |
| CA-Litter  | +                 | 5.0 $\pm$ 0.0  | 277.7 $\pm$ 3.2 | 1.5 $\pm$ 0.0                   | 7.2 $\pm$ 0.4  | 11.6 $\pm$ 0.9        | 0.57 $\pm$ 0.44         | 4.9   |
| WR1-BA     | +                 | 8.5 $\pm$ 0.2  | 62.6 $\pm$ 5.0  | 3.7 $\pm$ 0.1                   | 4.9 $\pm$ 0.6  | 0.7 $\pm$ 0.3         | <0.02                   | 2.9   |
| WR3-BA     | +                 | 7.9 $\pm$ 0.2  | 66.0 $\pm$ 5.5  | 3.9 $\pm$ 0.1                   | 7.1 $\pm$ 0.6  | 2.3 $\pm$ 0.2         | 0.22                    | 9.6   |
| WR4-BA     | +                 | 7.9 $\pm$ 0.1  | 42.3 $\pm$ 1.7  | 3.7 $\pm$ 0.2                   | 5.6 $\pm$ 0.3  | 2.1 $\pm$ 0.2         | <0.02                   | 1.0   |
| WR5-BA     | +                 | 7.8 $\pm$ 0.1  | 75.3 $\pm$ 7.5  | 3.4 $\pm$ 0.3                   | 6.7 $\pm$ 0.5  | 1.6 $\pm$ 0.1         | 0.08                    | 5.0   |
| WR7-BA     | +                 | 7.9 $\pm$ 0.1  | 49.3 $\pm$ 5.4  | 3.5 $\pm$ 0.1                   | 5.5 $\pm$ 0.5  | 1.7 $\pm$ 0.2         | 0.19                    | 11.2  |
| WR1-WA     | +                 | 10.0 $\pm$ 0.1 | 19.5 $\pm$ 0.2  | 4.7 $\pm$ 0.1                   | 2.7 $\pm$ 0.1  | 1.1 $\pm$ 0.2         | <0.02                   | 1.8   |
| WR2-WA     | +                 | 11.1 $\pm$ 0.0 | 9.0 $\pm$ 0.4   | 2.7 $\pm$ 0.1                   | 1.8 $\pm$ 0.1  | 0.5 $\pm$ 0.0         | <0.02                   | 4.0   |
| WR3-WA     | +                 | 10.5 $\pm$ 0.0 | 11.9 $\pm$ 0.4  | 2.4 $\pm$ 0.1                   | 1.9 $\pm$ 0.0  | 0.7 $\pm$ 0.1         | <0.02                   | 2.9   |
| WR6-WA     | +                 | 9.4 $\pm$ 0.1  | 13.7 $\pm$ 0.2  | 3.5 $\pm$ 0.0                   | 2.1 $\pm$ 0.1  | 1.1 $\pm$ 0.1         | <0.02                   | 1.8   |
| WR7-WA     | +                 | 10.0 $\pm$ 0.0 | 15.3 $\pm$ 1.6  | 3.0 $\pm$ 0.1                   | 2.0 $\pm$ 0.1  | 0.7 $\pm$ 0.3         | <0.02                   | 2.9   |
| RO1-BA1    | +                 | 7.6 $\pm$ 0.0  | 43.8 $\pm$ 3.1  | 3.6 $\pm$ 0.3                   | 4.3 $\pm$ 0.1  | 0.7 $\pm$ 0.1         | <0.02                   | 2.9   |
| RO1-BA2    | +                 | 7.5 $\pm$ 0.1  | 23.3 $\pm$ 1.4  | 3.3 $\pm$ 0.1                   | 3.3 $\pm$ 0.2  | 0.7 $\pm$ 0.3         | <0.02                   | 2.9   |
| RO1-BA3    | +                 | 7.4 $\pm$ 0.0  | 42.1 $\pm$ 6.6  | 2.8 $\pm$ 0.2                   | 3.9 $\pm$ 0.2  | 0.9 $\pm$ 0.2         | <0.02                   | 18.9  |
| RO2-BA1    | +                 | 7.3 $\pm$ 0.1  | 142.9 $\pm$ 2.9 | 1.8 $\pm$ 0.0                   | 12.7 $\pm$ 0.2 | 3.6 $\pm$ 0.2         | 0.38                    | 10.6  |
| RO2-BA2    | +                 | 7.1 $\pm$ 0.0  | 76.0 $\pm$ 26.2 | 2.3 $\pm$ 0.9                   | 6.5 $\pm$ 1.2  | 1.2 $\pm$ 0.1         | 0.08                    | 6.7   |
| RO2-BA3    | +                 | 7.2 $\pm$ 0.1  | 47.4 $\pm$ 1.6  | 3.2 $\pm$ 0.2                   | 5.7 $\pm$ 0.2  | 3.0 $\pm$ 0.3         | 0.22                    | 7.3   |
| RO3-BA1    | +                 | 7.3 $\pm$ 0.1  | 52.0 $\pm$ 1.1  | 4.3 $\pm$ 0.2                   | 6.2 $\pm$ 0.0  | 5.2 $\pm$ 0.4         | 2.33 $\pm$ 0.14         | 44.8  |
| RO3-BA2    | +                 | 7.2 $\pm$ 0.0  | 59.9 $\pm$ 3.4  | 3.4 $\pm$ 0.1                   | 6.1 $\pm$ 0.3  | 2.2 $\pm$ 0.1         | 0.20                    | 0.9   |
| RO3-BA3    | +                 | 7.0 $\pm$ 0.1  | 57.6 $\pm$ 3.0  | 3.1 $\pm$ 0.1                   | 5.1 $\pm$ 0.1  | 3.4 $\pm$ 0.6         | 0.23                    | 6.8   |
| RO1-WA1    | +                 | 9.4 $\pm$ 0.1  | 5.9 $\pm$ 0.4   | 2.5 $\pm$ 0.2                   | 1.3 $\pm$ 0.0  | 0.6 $\pm$ 0.0         | <0.02                   | 3.3   |
| RO1-WA2    | +                 | 8.9 $\pm$ 0.2  | 6.4 $\pm$ 0.3   | 3.0 $\pm$ 0.2                   | 1.5 $\pm$ 0.1  | 0.7 $\pm$ 0.2         | <0.02                   | 2.9   |
| RO1-WA3    | +                 | 8.7 $\pm$ 0.1  | 8.8 $\pm$ 0.2   | 4.3 $\pm$ 0.0                   | 1.5 $\pm$ 0.1  | 1.6 $\pm$ 0.1         | <0.02                   | 1.3   |
| RO2-WA1    | +                 | 10.9 $\pm$ 0.0 | 7.6 $\pm$ 0.5   | 1.8 $\pm$ 0.1                   | 1.4 $\pm$ 0.1  | 0.5 $\pm$ 0.1         | <0.02                   | 4.0   |
| RO2-WA2    | +                 | 11.0 $\pm$ 0.0 | 6.2 $\pm$ 0.4   | 1.9 $\pm$ 0.1                   | 1.4 $\pm$ 0.0  | 1.7 $\pm$ 0.1         | 0.08                    | 4.7   |
| RO2-WA3    | +                 | 11.0 $\pm$ 0.0 | 5.8 $\pm$ 0.4   | 1.0 $\pm$ 0.1                   | 1.2 $\pm$ 0.0  | 0.4 $\pm$ 0.1         | <0.02                   | 5.0   |
| RO3-WA1    | +                 | 10.1 $\pm$ 0.0 | 5.5 $\pm$ 0.1   | 2.2 $\pm$ 0.0                   | 1.2 $\pm$ 0.0  | 0.4 $\pm$ 0.1         | <0.02                   | 5.0   |
| RO3-WA2    | +                 | 10.1 $\pm$ 0.1 | 11.3 $\pm$ 1.3  | 4.4 $\pm$ 0.4                   | 1.6 $\pm$ 0.1  | 3.3 $\pm$ 0.3         | <0.02                   | 0.6   |
| RO3-WA3    | +                 | 10.2 $\pm$ 0.0 | 7.1 $\pm$ 0.7   | 2.5 $\pm$ 0.2                   | 1.4 $\pm$ 0.1  | 0.6 $\pm$ 0.1         | <0.02                   | 3.3   |

**Table S7** Summary of results of sealed incubation experiments after 12-weeks. Results are means  $\pm$  S.D., except for MeHg in which we pooled the majority of samples from replicates for analysis. All dissolved constituents represent  $<1.0\text{-}\mu\text{m}$  fraction. Note: smell is sulfide, “rotten” egg smell present (+) or absent (-); COND=conductivity; DOC=dissolved organic carbon; SUVA<sub>254</sub>=specific ultraviolet absorbance at 254 nm (proxy of DOC aromaticity); TDN=total dissolved nitrogen; Hg=mercury; MeHg=methylmercury; %MeHg=percent of Hg as MeHg.

|            | Sulfidic<br>smell | COND<br>( $\mu\text{S/cm}$ ) | pH             | DOC<br>(mg/L)   | SUVA <sub>254</sub><br>(L/mg/m) | TDN<br>(mg/L)  | Filtered<br>Hg (ng/L) | Filtered<br>MeHg<br>(ng/L) | %MeHg |
|------------|-------------------|------------------------------|----------------|-----------------|---------------------------------|----------------|-----------------------|----------------------------|-------|
| Water-only | -                 | 124 $\pm$ 3                  | 6.6 $\pm$ 0.3  | 7.0 $\pm$ 0.5   | 2.8 $\pm$ 0.3                   | 0.3 $\pm$ 0.0  | 0.4 $\pm$ 0.1         | <0.02                      | 0.0   |
| CA-Litter  | +                 | 387 $\pm$ 4                  | 6.8 $\pm$ 0.4  | 305.6 $\pm$ 3.6 | 1.5 $\pm$ 0.1                   | 3.6 $\pm$ 0.5  | 2.8 $\pm$ 0.2         | 0.13                       | 4.8   |
| WR1-BA     | +                 | 645 $\pm$ 17                 | 7.7 $\pm$ 0.0  | 76.6 $\pm$ 8.2  | 3.9 $\pm$ 0.2                   | 4.8 $\pm$ 0.3  | 0.5 $\pm$ 0.1         | <0.02                      | 3.3   |
| WR3-BA     | +                 | 715 $\pm$ 18                 | 7.7 $\pm$ 0.0  | 79.5 $\pm$ 3.7  | 3.9 $\pm$ 0.1                   | 9.5 $\pm$ 0.4  | 1.1 $\pm$ 0.1         | 0.10                       | 9.2   |
| WR4-BA     | +                 | 540 $\pm$ 38                 | 7.8 $\pm$ 0.0  | 53.1 $\pm$ 7.8  | 3.7 $\pm$ 0.2                   | 6.5 $\pm$ 1.1  | 1.3 $\pm$ 0.1         | 0.06                       | 4.4   |
| WR5-BA     | +                 | 864 $\pm$ 22                 | 8.0 $\pm$ 0.1  | 72.4 $\pm$ 1.9  | 3.7 $\pm$ 0.0                   | 8.1 $\pm$ 0.2  | 0.9 $\pm$ 0.0         | 0.04                       | 4.3   |
| WR7-BA     | +                 | 607 $\pm$ 34                 | 7.9 $\pm$ 0.1  | 57.1 $\pm$ 3.5  | 3.5 $\pm$ 0.2                   | 6.3 $\pm$ 0.1  | 1.0 $\pm$ 0.2         | 0.10                       | 10.0  |
| WR1-WA     | +                 | 258 $\pm$ 1                  | 9.3 $\pm$ 0.3  | 18.3 $\pm$ 0.3  | 5.4 $\pm$ 0.1                   | 2.7 $\pm$ 0.1  | 1.1 $\pm$ 0.0         | 0.06                       | 5.5   |
| WR2-WA     | +                 | 906 $\pm$ 86                 | 11.2 $\pm$ 0.1 | 7.9 $\pm$ 0.3   | 3.5 $\pm$ 0.2                   | 1.7 $\pm$ 0.1  | 0.6 $\pm$ 0.1         | 0.04                       | 6.9   |
| WR3-WA     | +                 | 363 $\pm$ 28                 | 10.1 $\pm$ 0.1 | 8.2 $\pm$ 0.5   | 4.1 $\pm$ 0.4                   | 1.7 $\pm$ 0.0  | 0.9 $\pm$ 0.2         | 0.05                       | 6.2   |
| WR6-WA     | +                 | 432 $\pm$ 6                  | 9.0 $\pm$ 0.1  | 8.4 $\pm$ 0.4   | 5.7 $\pm$ 0.1                   | 2.1 $\pm$ 0.1  | 0.7 $\pm$ 0.3         | 0.05                       | 6.5   |
| WR7-WA     | +                 | 497 $\pm$ 42                 | 9.7 $\pm$ 0.1  | 9.3 $\pm$ 1.0   | 5.2 $\pm$ 0.3                   | 1.9 $\pm$ 0.1  | 0.5 $\pm$ 0.2         | <0.02                      | 4.3   |
| RO1-BA1    | +                 | 493 $\pm$ 28                 | 8.2 $\pm$ 0.2  | 37.2 $\pm$ 3.5  | 5.3 $\pm$ 0.1                   | 4.8 $\pm$ 0.2  | 0.4 $\pm$ 0.1         | 0.05                       | 11.8  |
| RO1-BA2    | +                 | 391 $\pm$ 29                 | 8.0 $\pm$ 0.1  | 16.3 $\pm$ 0.5  | 4.4 $\pm$ 0.1                   | 3.0 $\pm$ 0.1  | 0.4 $\pm$ 0.0         | 0.03                       | 6.7   |
| RO1-BA3    | +                 | 422 $\pm$ 35                 | 7.8 $\pm$ 0.0  | 29.9 $\pm$ 1.1  | 4.9 $\pm$ 0.1                   | 3.7 $\pm$ 0.1  | 0.4 $\pm$ 0.1         | 0.06                       | 13.0  |
| RO2-BA1    | +                 | 715 $\pm$ 23                 | 7.8 $\pm$ 0.1  | 78.8 $\pm$ 1.3  | 3.4 $\pm$ 0.0                   | 13.8 $\pm$ 0.3 | 1.6 $\pm$ 0.1         | 0.05                       | 3.1   |
| RO2-BA2    | +                 | 641 $\pm$ 10                 | 7.8 $\pm$ 0.1  | 56.0 $\pm$ 0.7  | 3.3 $\pm$ 0.0                   | 7.9 $\pm$ 0.1  | 0.7 $\pm$ 0.1         | 0.03                       | 4.2   |
| RO2-BA3    | +                 | 557 $\pm$ 5                  | 8.0 $\pm$ 0.2  | 52.6 $\pm$ 2.6  | 3.4 $\pm$ 0.1                   | 8.8 $\pm$ 0.3  | 1.6 $\pm$ 0.2         | 0.05                       | 3.3   |
| RO3-BA1    | +                 | 598 $\pm$ 6                  | 7.9 $\pm$ 0.0  | 54.7 $\pm$ 1.2  | 4.6 $\pm$ 0.1                   | 8.0 $\pm$ 0.2  | 1.9 $\pm$ 0.1         | 0.35                       | 18.4  |
| RO3-BA2    | +                 | 621                          | 8.1            | 52.5            | 3.8                             | 8.1            | 1.0                   | 0.03                       | 3.0   |
| RO3-BA3    | +                 | 605                          | 8.0            | 53.2            | 3.6                             | 7.9            | 1.6                   | 0.14                       | 8.8   |
| RO1-WA1    | +                 | 214 $\pm$ 3                  | 9.0 $\pm$ 0.0  | 5.0 $\pm$ 0.2   | 3.0 $\pm$ 0.0                   | 1.1 $\pm$ 0.1  | 0.5 $\pm$ 0.1         | <0.02                      | 3.0   |
| RO1-WA2    | +                 | 183 $\pm$ 12                 | 8.2 $\pm$ 0.3  | 5.1 $\pm$ 0.1   | 3.5 $\pm$ 0.0                   | 1.3 $\pm$ 0.0  | 0.5 $\pm$ 0.1         | <0.02                      | 4.7   |
| RO1-WA3    | -                 | 306 $\pm$ 21                 | 8.0 $\pm$ 0.1  | 7.6 $\pm$ 0.4   | 4.7 $\pm$ 0.1                   | 1.1 $\pm$ 0.1  | 1.0 $\pm$ 0.2         | <0.02                      | 2.2   |
| RO2-WA1    | -                 | 3,113 $\pm$ 201              | 10.8 $\pm$ 0.0 | 7.2 $\pm$ 0.4   | 2.0 $\pm$ 0.1                   | 1.3 $\pm$ 0.1  | 0.3 $\pm$ 0.1         | <0.02                      | 5.0   |
| RO2-WA2    | -                 | 948 $\pm$ 35                 | 11.2 $\pm$ 0.1 | 6.5 $\pm$ 0.2   | 2.4 $\pm$ 0.1                   | 1.4 $\pm$ 0.1  | 5.3 $\pm$ 1.0         | 0.12                       | 2.3   |
| RO2-WA3    | +                 | 664 $\pm$ 50                 | 11.1 $\pm$ 0.1 | 5.0 $\pm$ 0.2   | 1.4 $\pm$ 0.1                   | 1.0 $\pm$ 0.0  | 0.3 $\pm$ 0.1         | 0.04                       | 13.6  |
| RO3-WA1    | +                 | 1,168 $\pm$ 42               | 10.0 $\pm$ 0.0 | 5.1 $\pm$ 0.1   | 2.4 $\pm$ 0.1                   | 1.0 $\pm$ 0.1  | 0.4 $\pm$ 0.1         | <0.02                      | 3.3   |
| RO3-WA2    | +                 | 853 $\pm$ 68                 | 9.8 $\pm$ 0.1  | 10.4 $\pm$ 0.2  | 4.8 $\pm$ 0.1                   | 1.6 $\pm$ 0.2  | 3.0 $\pm$ 0.4         | 0.03                       | 0.9   |
| RO3-WA3    | -                 | 711 $\pm$ 31                 | 10.1 $\pm$ 0.0 | 6.2 $\pm$ 0.1   | 2.8 $\pm$ 0.0                   | 1.1 $\pm$ 0.0  | 0.5 $\pm$ 0.1         | 0.05                       | 8.5   |

pre-sieved

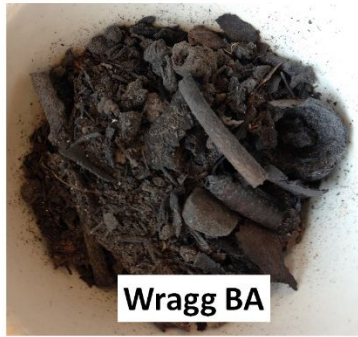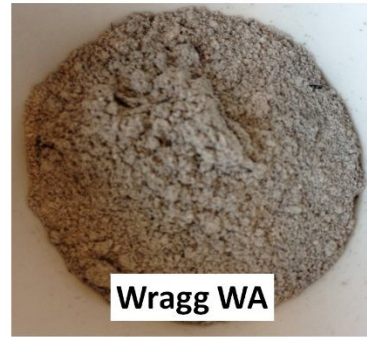

2-mm sieved

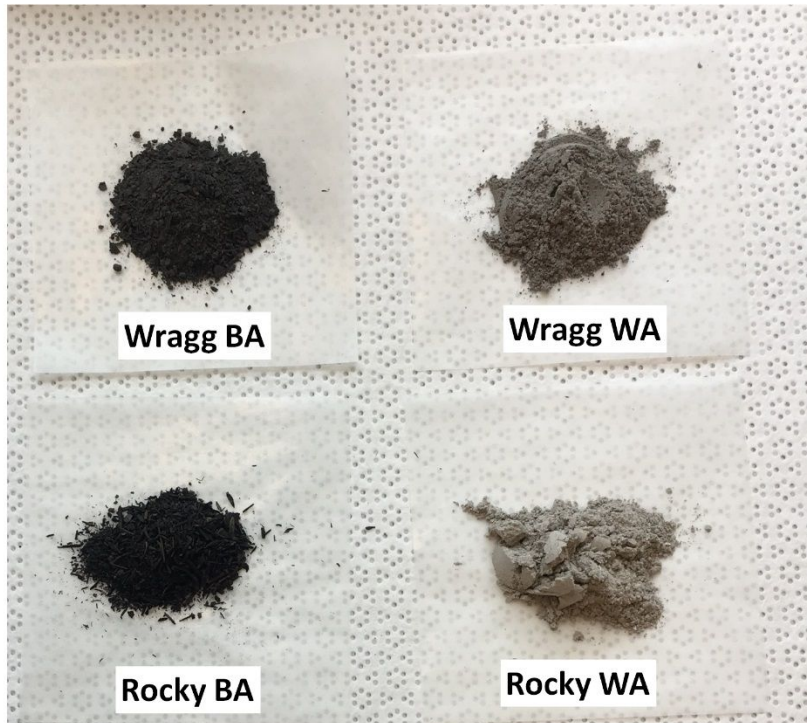

255  
256

257 **Fig. S1** Top-pictures of pre-sieved surface (0-5 cm depth) ash samples -- black ash (BA) and white ash  
258 (WA) from the Wragg Fire (2015). Bottom-pictures of 2-mm sieved surface (0-5 cm depth) ash samples -  
259 - black ash (BA) and white ash (WA) from the Wragg Fire (2015), and the Rocky Fire (2015). Pictures  
260 taken by P. Ku and M. Tsui.



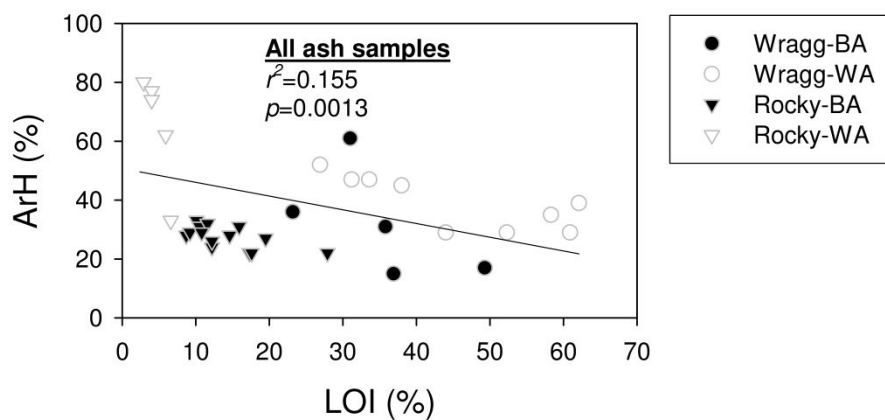

**Fig. S2** Variation of percent aromatic hydrocarbon (ArH) of pyrolysis products as a function of loss-on-ignition (LOI) of black ash (BA) and white ash (WA) from the Wragg Fire and the Rocky Fire.

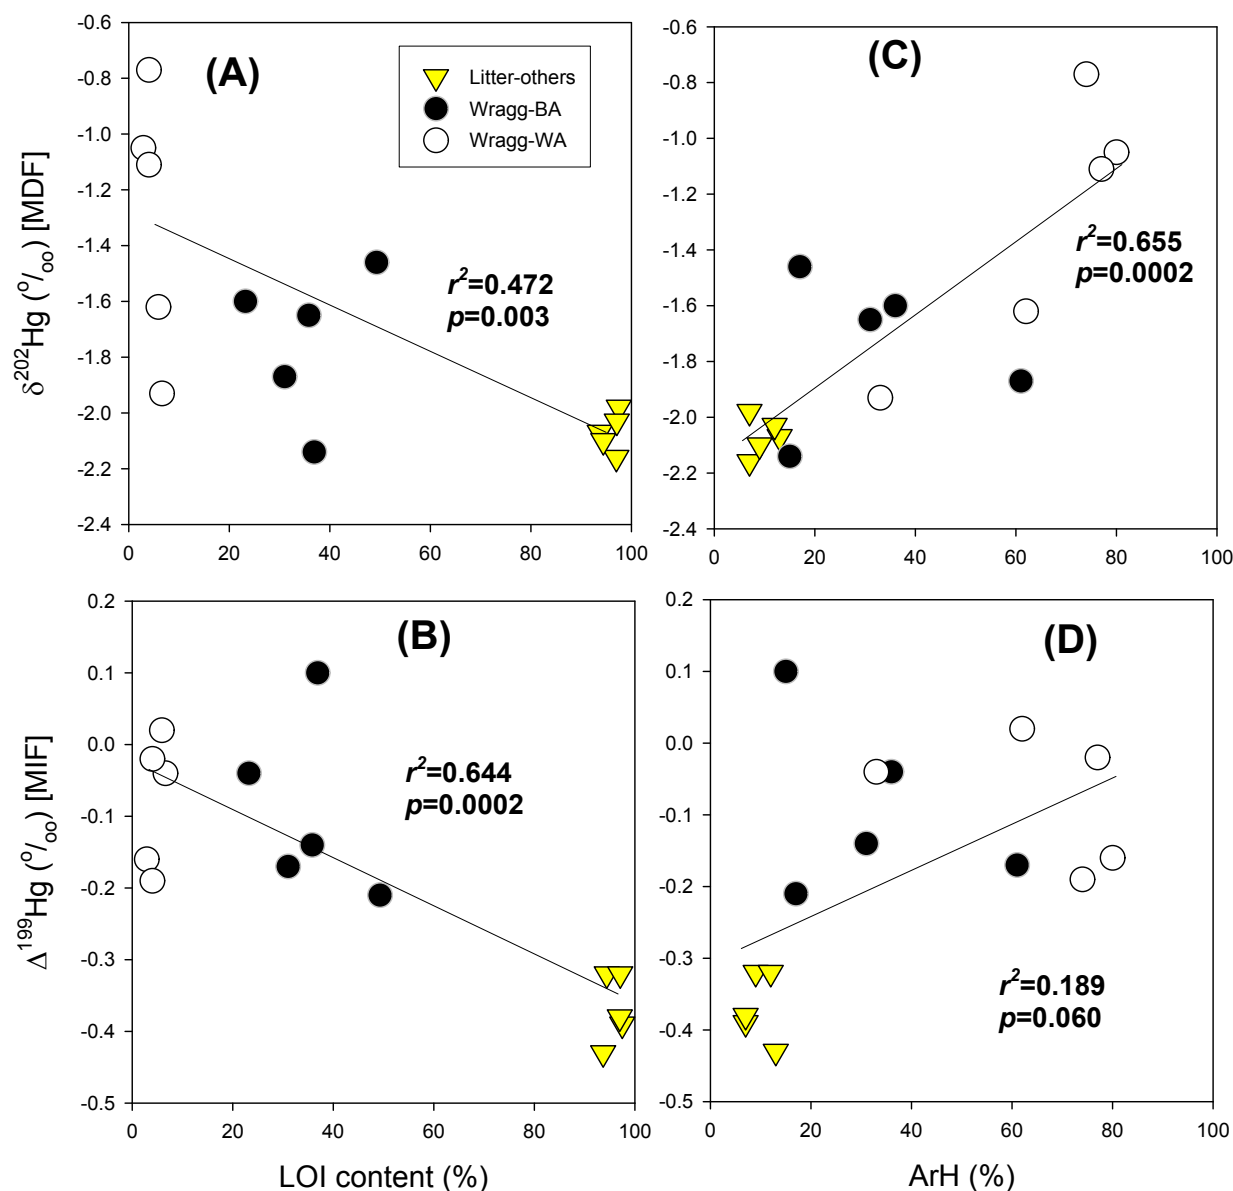

**Fig. S3** Relationships between loss-on-ignition (LOI) and (A)  $\delta^{202}\text{Hg}$  (mass-dependent fractionation [MDF]), and (B)  $\Delta^{199}\text{Hg}$  (mass-independent fractionation [MIF]) of Hg isotopes among different unburned litter and ash samples. Relationships between percent of aromatic hydrocarbon (ArH) of pyrolysis products content and (C)  $\delta^{202}\text{Hg}$  (mass-dependent fractionation [MDF]), and (D)  $\Delta^{199}\text{Hg}$  (mass-independent fractionation [MIF]) of Hg isotopes among different unburned and ash samples. Published isotope data of foliage was not included as that particular study<sup>15</sup> did not provide information on LOI and ArH.

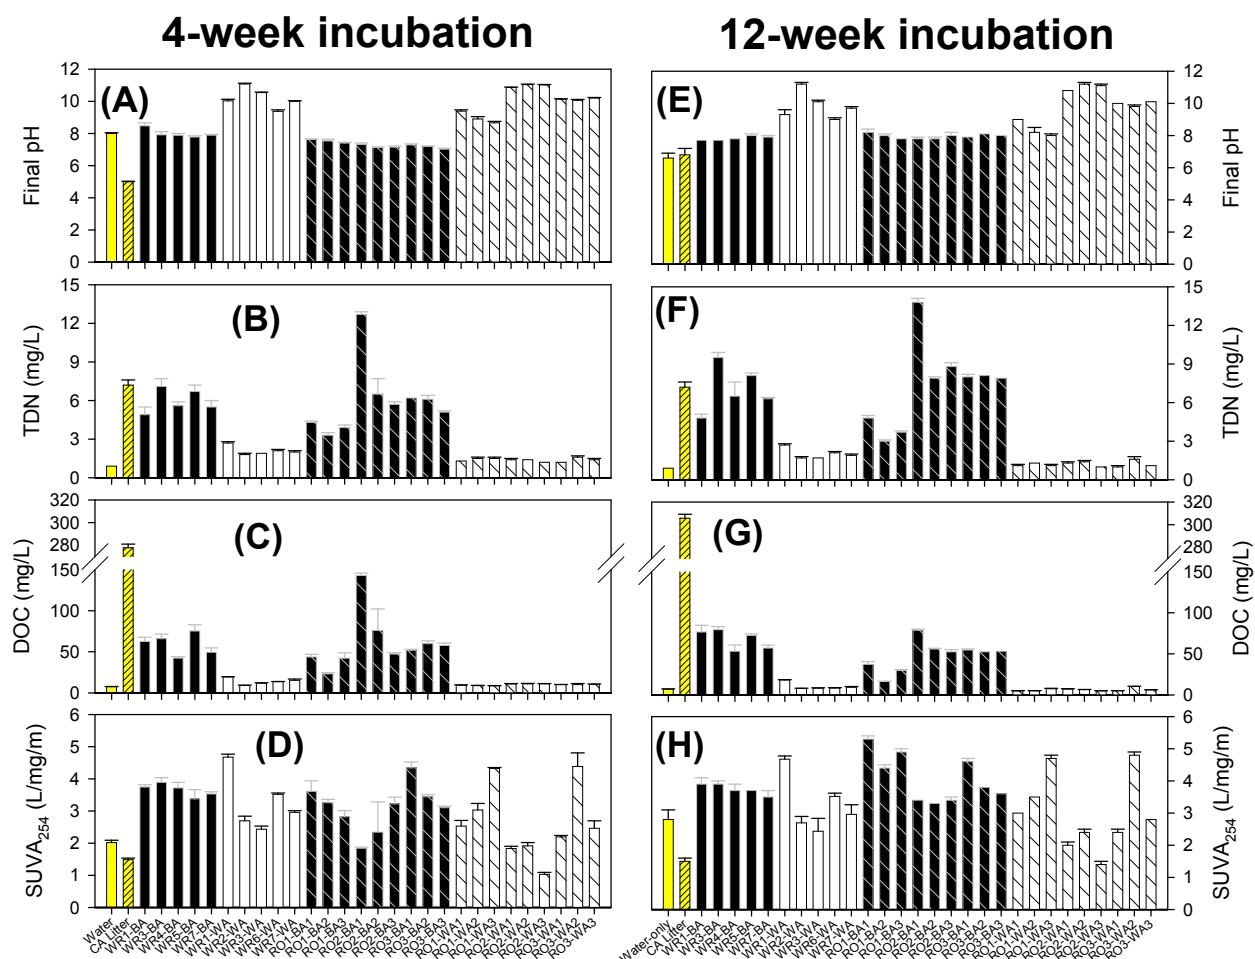

**Fig. S4** Data from incubation experiment for 4-week and 12-week, data are mean $\pm$ s.d. ( $n=3$ ; except RO3-BA2 and RO3-BA3 where  $n=1$ ). (A, E) final pH at 4- and 12-week; (B, F) total dissolved nitrogen (TDN) at 4- and 12-week; (C, G) dissolved organic carbon (DOC) at 4- and 12-week; and (D, H) proxy of DOC aromaticity (SUVA<sub>254</sub>) of the aqueous phase at 4- and 12-week. Note: Yellow: water-only; Hatched yellow: unburned litter from a northern California forest (Angelo Reserve); Black: BA from Wragg; White: WA from Wragg; Hatched black: BA from Rocky; Hatched white: WA from Rocky.

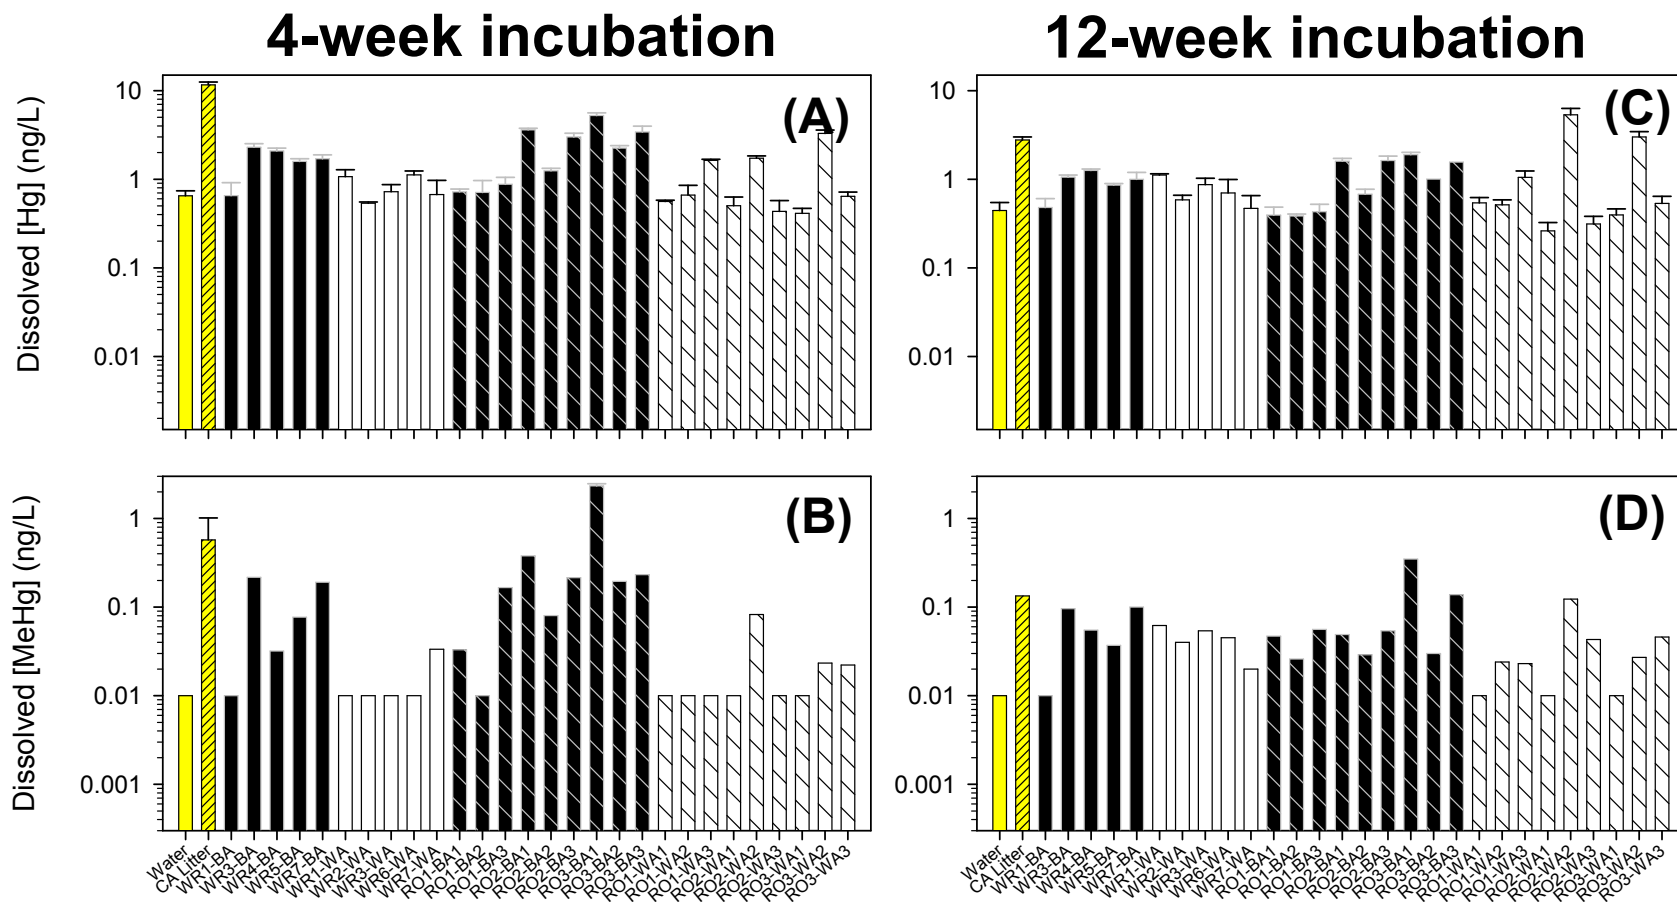

282  
 283 **Fig. S5** Concentrations of dissolved (<1- $\mu$ m) mercury concentrations ([Hg]; **A** and **C**) and dissolved methylmercury concentrations ([MeHg]; **B**  
 284 and **D**) after 4- or 12-weeks of sealed incubation from water only (filtered stream water only, no solid materials added), unburned California litter  
 285 (CA Litter), Wragg Fire black ash (WRX-BA), Wragg Fire white ash (WRX-WA), Rocky Fire black ash (RO#-BA), and Rocky Fire white ash  
 286 (RO#-WA), where # is the site locations. Data are mean $\pm$ s.d. ( $n=3$  for Hg data while  $n=1$  for most MeHg data).

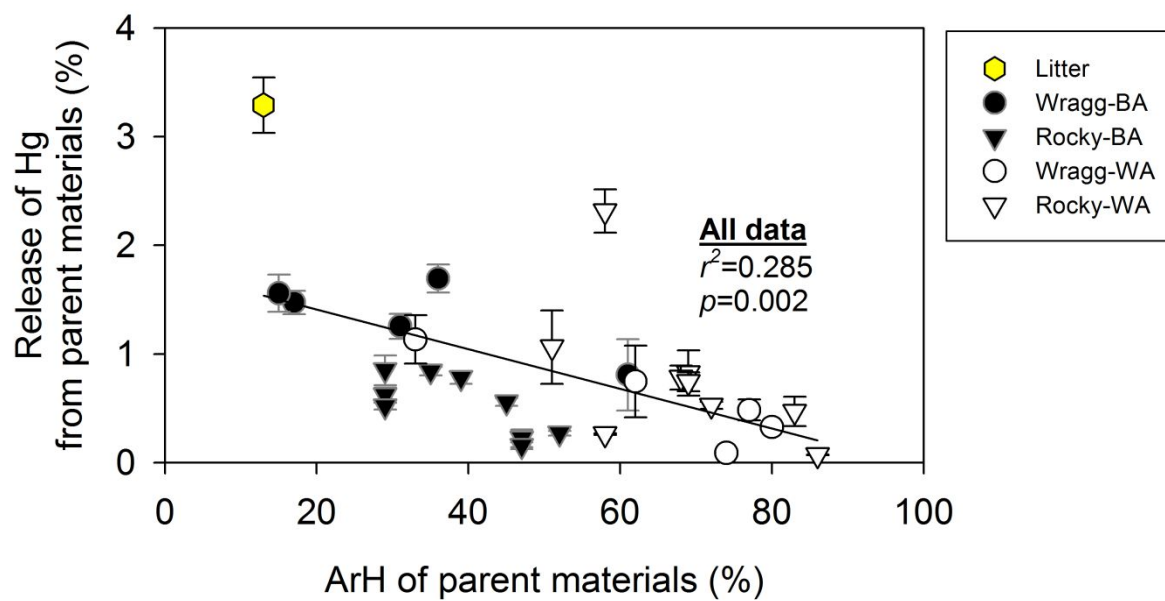

**Fig. S6** Relationships among parameters after 4 weeks of sealed incubation experiment. Release of Hg from parent materials as a function of percent aromatic hydrocarbon (ArH) content of pyrolysis products.

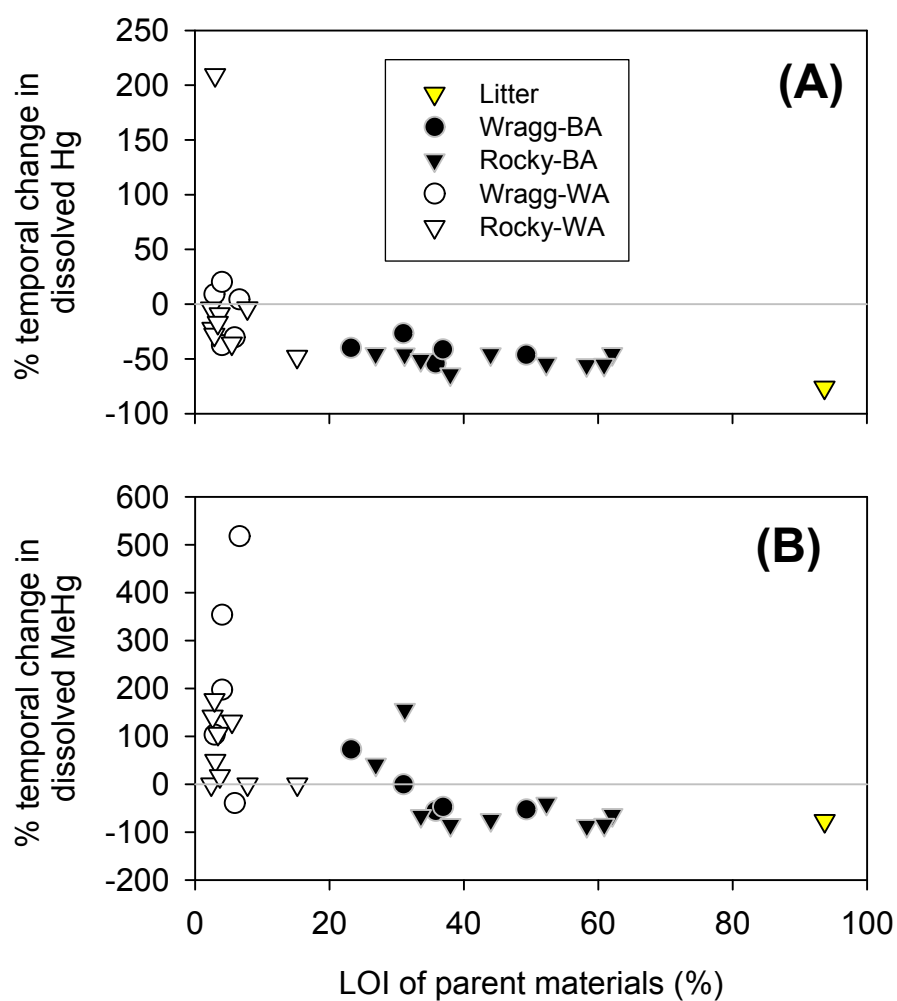

**Fig. S7** Temporal percent changes of dissolved **(A)** mercury (Hg) and **(B)** methylmercury (MeHg) concentrations in incubation bottles from 4-weeks to 12-weeks among incubation materials of different loss-on-ignition (LOI).

## SI References

1. Olund, S. D.; DeWild, J. F.; Olson, M. L.; Tate, M. T. Methods for the preparation and analysis of solids and suspended solids for total mercury. Chapter 8 of Book 5, Laboratory Analysis Section A, Water Analysis. 2004. U.S. Geological Survey, Reston, Virginia.
2. Song, J., Peng, P. A. Characterisation of black carbon materials by pyrolysis–gas chromatography–mass spectrometry. *J. Anal. Appl. Pyrolysis* **2010**, 87, 129-137.
3. Chen, H.; Blosser, G. D.; Majidzadeh, H.; Liu, X.; Conner, W. H.; Chow, A. T. Integration of an automated identification-quantification pipeline and statistical techniques for pyrolysis GC/MS tracking of the molecular fingerprints of natural organic matter. *J. Anal. Appl. Pyrolysis* **2018**, 143, 371-380.
4. Blum, J. D.; Bergquist, B. A. Reporting of variations in the natural isotopic composition of mercury. *Anal. Bioanal. Chem.* **2007**, 388, 353-359.
5. Demers, J. D.; Blum, J. D.; Zak, D. R. Mercury isotopes in a forested ecosystem: Implications for air-surface exchange dynamics and the global mercury cycle. *Glob. Biogeochem. Cycles* **2013**, 27, 222-238.
6. Tsui, M. T. K.; Blum, J. D.; Kwon, S. Y.; Finlay, J. C.; Balogh, S. J.; Nollet, Y. H. Photodegradation of methylmercury in stream ecosystems. *Limnol. Oceanogr.* **2013**, 58, 13-22.
7. Tsui, M. T. K.; Blum, J. D.; Finlay, J. C.; Balogh, S. J.; Nollet, Y. H.; Palen, W. J.; Power, M. E. Variation in terrestrial and aquatic sources of methylmercury in stream predators as revealed by stable mercury isotopes. *Environ. Sci. Technol.* **2014**, 48, 10128-10135.
8. Woerdle, G. E.; Tsui, M. T. K.; Sebestyen, S. D.; Blum, J. D.; Nie, X.; Kolka, R. K. New insights on ecosystem mercury cycling revealed by Hg isotopic measurements in water flowing from a headwater peatland catchment. *Environ. Sci. Technol.* **2018**, 52, 1854-1861.
9. Balogh, S. J.; Huang, Y.; Offerman, H. J.; Meyer, M. L.; Johnson, D. K. 2002. Episodes of elevated methylmercury concentrations in prairie streams. *Environ. Sci. Technol.* **2002**, 36, 1665-1670.
10. Tsui, M. T. K.; Finlay, J. C.; Nater, E. A. Effects of stream water chemistry and tree species on release and methylation of mercury during litter decomposition. *Environ. Sci. Technol.* **2008**, 42, 8692-8697.
11. Blum, P. W.; Hershey, A. E.; Tsui, M. T. K.; Hammerschmidt, C. R.; Agather, A. M. Methylmercury and methane production potentials in North Carolina Piedmont stream sediments. *Biogeochemistry* **2018**, 137, 181-195.
12. Parker, J. L.; Bloom, N. S. Preservation and storage techniques for low-level aqueous mercury speciation. *Sci. Total Environ.* **2005**, 337, 253-263.
13. Mitchell, C. P. J.; Branfireun, B. A.; Kolka, R. K. Spatial characteristics of net methylmercury production hot spots in peatlands. *Environ. Sci. Technol.* **2008**, 42, 1010-1016.
14. Weishaar, J. L.; Aiken, G. R.; Bergamaschi, B. A.; Fram, M. S.; Fujii, R.; Mopper, K. Evaluation of specific ultraviolet absorbance as an indicator of the chemical composition and reactivity of dissolved organic carbon. *Environ. Sci. Technol.* **2003**, 37, 4702-4708.
15. Zheng, W.; Obrist, D.; Weis, D.; Bergquist, B. A. Mercury isotope compositions across North American forests. *Glob. Biogeochem. Cycles* **2016**, 30, 1475-1492.
